# Supplementary material
Source: PubMed Central journal article supplement (PMC3800123)
Supplement: NIHMS512853-supplement-1.pdf [file NIHMS512853-supplement-1.pdf]

**Supplemental Table I.** Anti-PC mice exhibit considerable infiltration in the brain despite attenuated clinical signs.

|                                                                   | <b>IgG Control</b> | <b>Anti-PC</b> |
|-------------------------------------------------------------------|--------------------|----------------|
| <b>Severe CNS infiltration with clinical signs (Day 14-17)</b>    | <b>62.5 %</b>      | <b>16.6 %</b>  |
| <b>Severe CNS infiltration with no clinical signs (Day 14-17)</b> | <b>0 %</b>         | <b>33.3 %</b>  |
| <b>No CNS infiltration with no clinical signs (Day 14 – 17)</b>   | <b>37.5 %</b>      | <b>50 %</b>    |

---

---

---

## Supplemental Figure 1

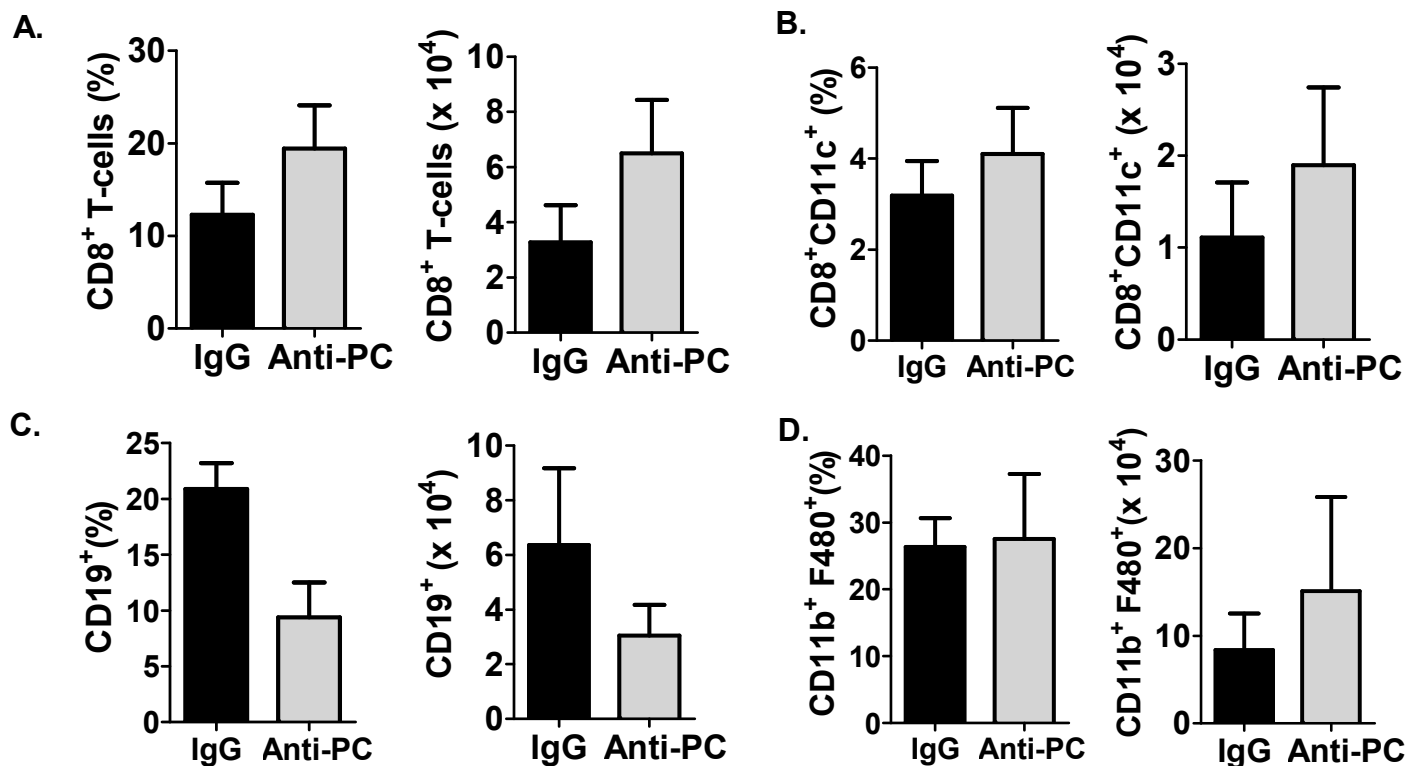

**Supplemental Figure 1. The absolute numbers of various infiltrating leukocyte populations in the CNS are not considerably different between anti-PC and IgG mice.** Cellular infiltrates from the brains of anti-PC and control mice were isolated by percoll gradient, and cells were subjected to flow cytometry analysis to assess the frequency (among CD45<sup>high</sup> cells) and absolute cell counts of (A) CD8<sup>+</sup> T-cells, (B) CD8<sup>+</sup>CD11c<sup>+</sup> cells, (C) CD19<sup>+</sup> cells, and (D) CD11b<sup>+</sup>F480<sup>+</sup> cells. Data are represented as means  $\pm$  SEM.

## Supplemental Figure 2

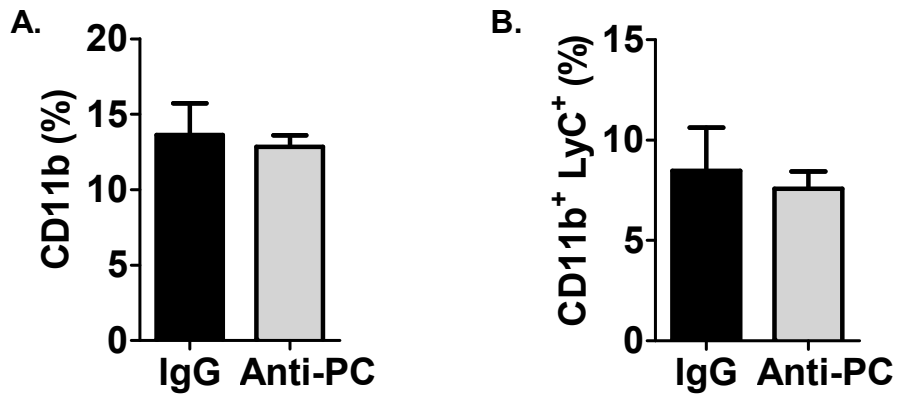

**Supplemental Figure 2. The frequency of splenic CD11b+ populations in naïve mice was not altered following anti-PC treatment.** Splenocytes were harvested from naïve mice following anti-PC or IgG treatment and the frequency of **(A)** CD11b+ cells **(B)** CD11b+Ly6C+ cells was assessed by flow cytometry.

### Supplemental Figure 3

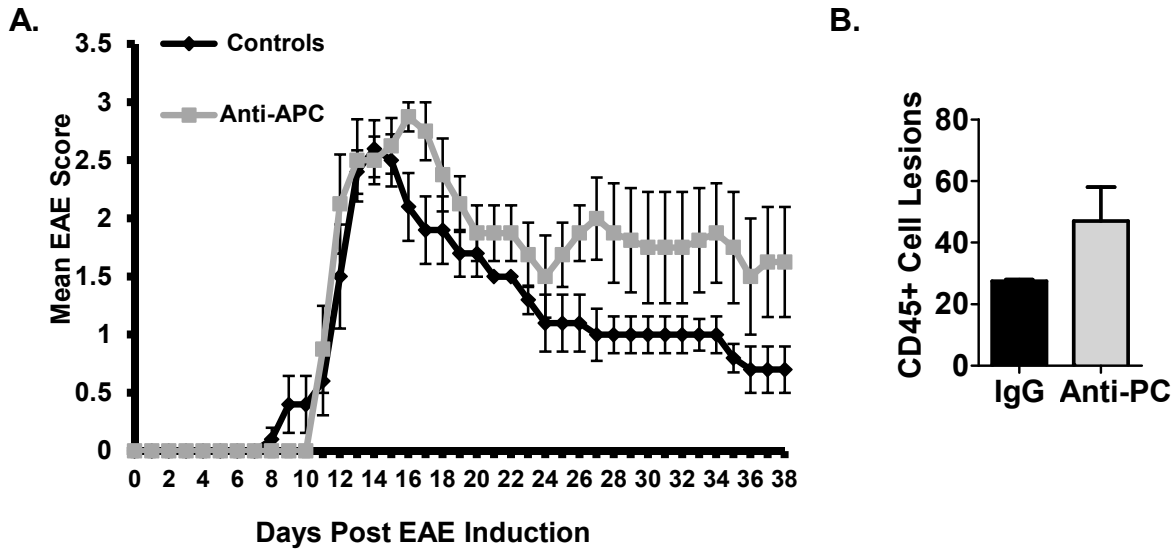

**Supplemental Figure 3. Anti-PC treatment after EAE onset does not attenuate disease severity.** (A) Mice induced with EAE were treated with anti-PC or IgG after disease onset, specifically on days 12, 14, 16 post EAE induction. Mice were monitored daily to assess clinical signs. Scores were plotted as means  $\pm$  SEM (anti-PC n = 4, IgG n = 5). (B) CD45<sup>+</sup> cell aggregates in brain sections of mice from anti-PC or IgG groups were individually counted at 10X magnification using a Zeiss Axio Imager M1 microscope. Counts are represented as means  $\pm$  SEM.
